# Supplementary material for: Moisture sources and dynamics over southeastern Tibetan Plateau reflected in dual water vapor isotopes
Source: Copernicus journal article supplement (doi:10.5194/egusphere-2024-3801), 2025-01-07
Supplement: Supplementary file 1 [file egusphere-2024-3801-supplement.pdf]

1 *Supporting information for*

2 **Moisture sources and dynamics over southeastern Tibetan**  
3 **Plateau reflected in dual water vapor isotopes**

4  
5 Zhongyin Cai<sup>1\*</sup>, Rong Li<sup>1</sup>, Cheng Wang<sup>1</sup>, Qiukai Mao<sup>1</sup>, Lide Tian<sup>1</sup>

6  
7 <sup>1</sup>Institute of International Rivers and Eco-security, Yunnan Key Laboratory of International Rivers and  
8 Transboundary Eco-security, Ministry of Education Key Laboratory for Ecosecurity of Southwest China,  
9 Yunnan University, Kunming, China

10  
11 \*Corresponding author: Zhongyin Cai ([czypil@gmail.com](mailto:czypil@gmail.com) and [z.cai@ynu.edu.cn](mailto:z.cai@ynu.edu.cn))

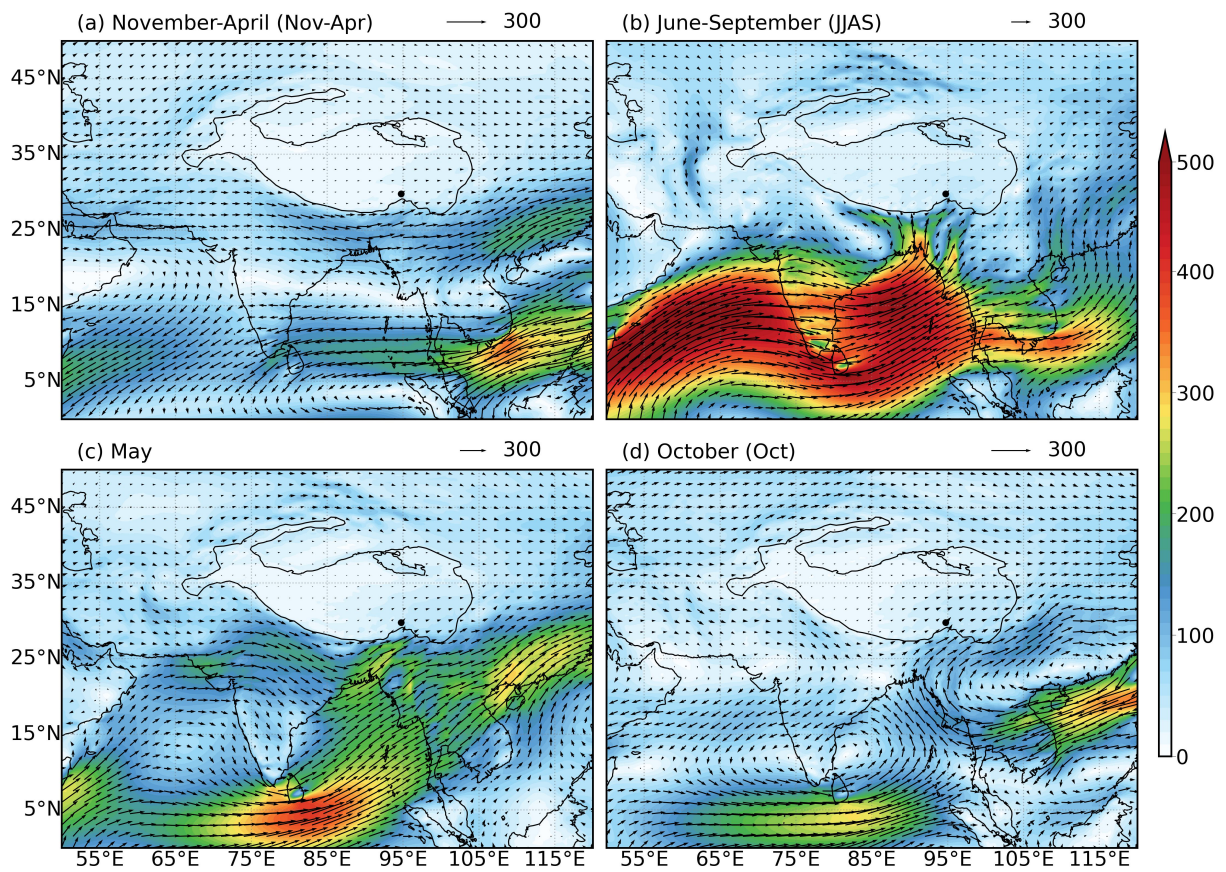

13  
 14 Figure S1. Location of the South-East Tibetan Plateau station (SETP) and the climatological moisture  
 15 transport pattern during different seasons. (a) climatological mean (1991-2020) vertical integral water vapor  
 16 transport (vectors and shading,  $\text{kg m}^{-1} \text{s}^{-1}$ ) for the non-monsoon season of November-April (Nov-Apr). (b-d)  
 17 are the same (a), but for the summer monsoon season of June-September (JJAS, b), May (c), and October  
 18 (d), respectively. The black dots indicate the location of the SETP station. The black solid lines denote the  
 19 Tibetan Plateau with altitude contour at 3000 m.

20

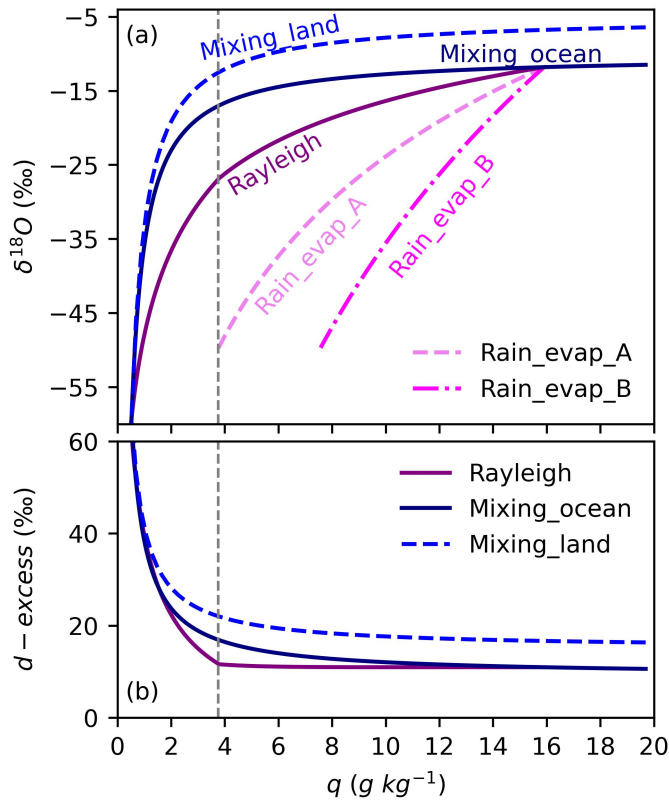

21

22 Figure S2. Theoretical pathways of the evolution of water vapor isotope compositions along with specific  
 23 humidity ( $q$ ). (a) the evolution of  $\delta^{18}\text{O}$  along with  $q$ : the solid navy curve (Mixing\_ocean) indicate the  
 24 evolution of  $\delta^{18}\text{O}$  by the mixing between a wet end member of typical ocean surface water vapor ( $\delta^{18}\text{O} = -$   
 25  $11.5\%$ ,  $\delta^2\text{H} = -81.0\%$ , and  $q$  equals the saturation humidity at  $25^\circ\text{C}$ ) with a dry end member with an isotopic  
 26 signature of ( $\delta^{18}\text{O} = -60.3\%$ ,  $\delta^2\text{H} = -418.0\%$ , and  $q = 0.5 \text{ g kg}^{-1}$ ). The solid purple curve (Rayleigh) indicates  
 27 the evolution of  $\delta^{18}\text{O}$  by the Rayleigh distillation starting with a relative humidity of 80% at ocean surface.  
 28 The dashed blue curves have the same configuration as the solid blue curve, but the isotopic composition of  
 29 the wet end member is set to  $\delta^{18}\text{O} = -5\%$  and  $\delta^2\text{H} = -35\%$  to represent vapor dominated by land surface  
 30 evapotranspiration. The dashed violet and dash-dotted magenta curve represents the super-Rayleigh  
 31 distillation under two different degrees of rain evaporation (Rain evap A and Rain evap B). A more detailed  
 32 description of configurations for these reference lines are referred to section 2.3.

33

34

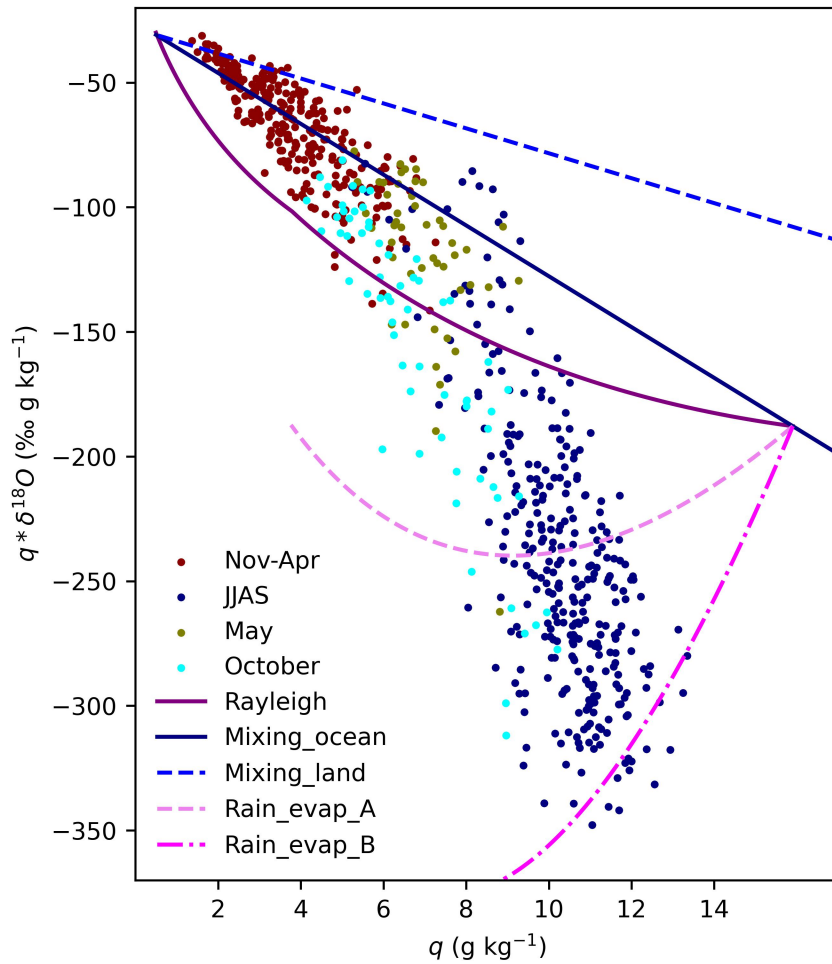

35

36 Figure S3. Relationships between specific humidity ( $q$ ) and the product of  $q$  and vapor  $\delta^{18}\text{O}$  ( $q \times \delta^{18}\text{O}$ ). Non-  
 37 monsoon season (Nov-Apr) data are shown as dark red dots, summer monsoon season (JJAS) data as navy  
 38 dots, data for May as olive dots, and data for October as cyan dots. Settings for reference lines of Rayleigh  
 39 distillation (the purple solid line), mixing with ocean evaporation (the navy solid line), mixing with land  
 40 evapotranspiration (the blue dashed line), and partial rain evaporation under two different configurations (the  
 41 pink dashed and magenta dash-dotted lines) are the same as those in Fig. S2.

42

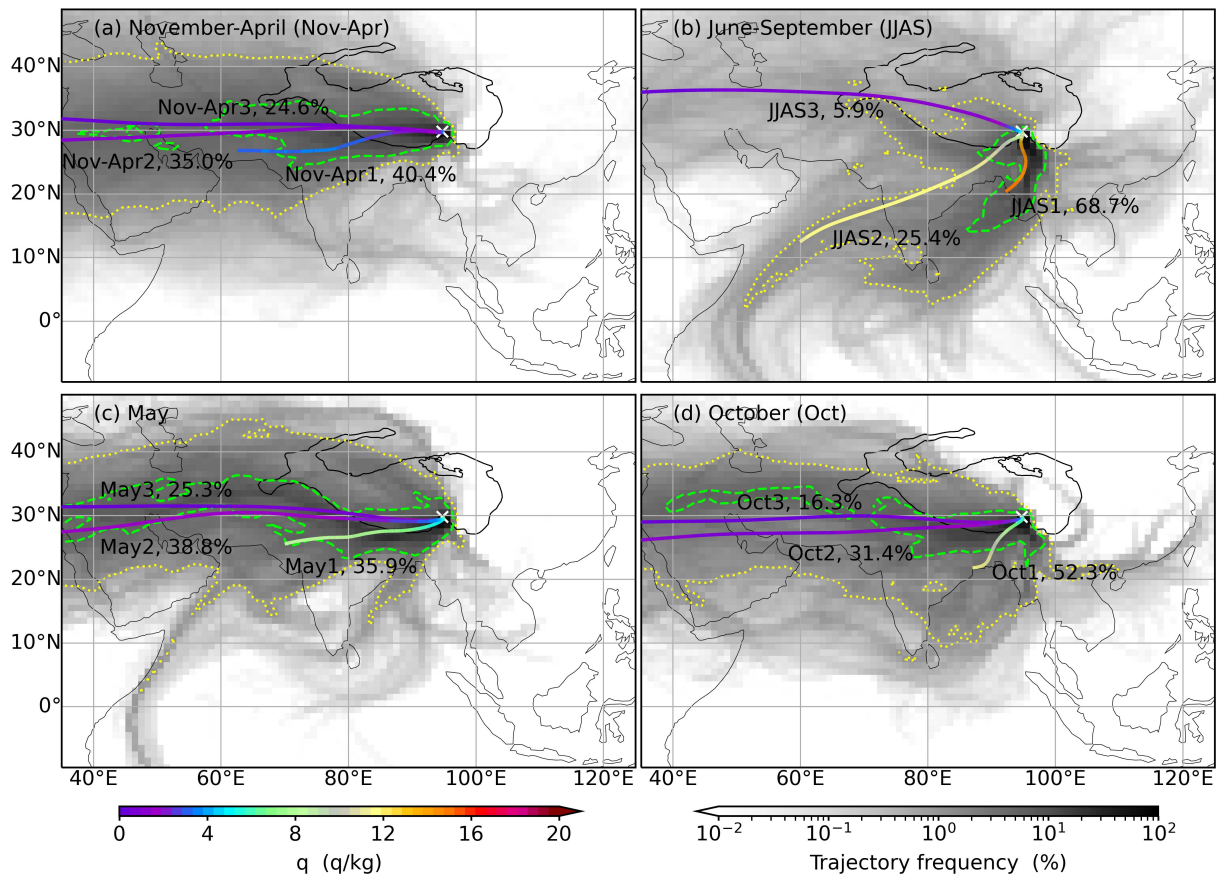

43  
 44 Figure S4. Air mass trajectory frequency and transport pathways during different seasons from 2015-2017.  
 45 (a) spatial distribution of air mass trajectory frequency over each  $1^\circ \times 1^\circ$  box (shading) and specific humidity  
 46 ( $q$ ) along mean trajectories of air parcel transport for the non-monsoon season (November-April). (b-d) are  
 47 the same as (a), but for the summer monsoon season (b, JJAS), May (c), and October (d). The dotted yellow  
 48 and dashed green contours indicate the trajectory frequency at 1% and 5%, respectively. The yellow crosses  
 49 indicate the location of the SETP station. The black solid lines denote the Tibetan Plateau with altitude  
 50 contour at 3000 m.

51  
 52  
 53

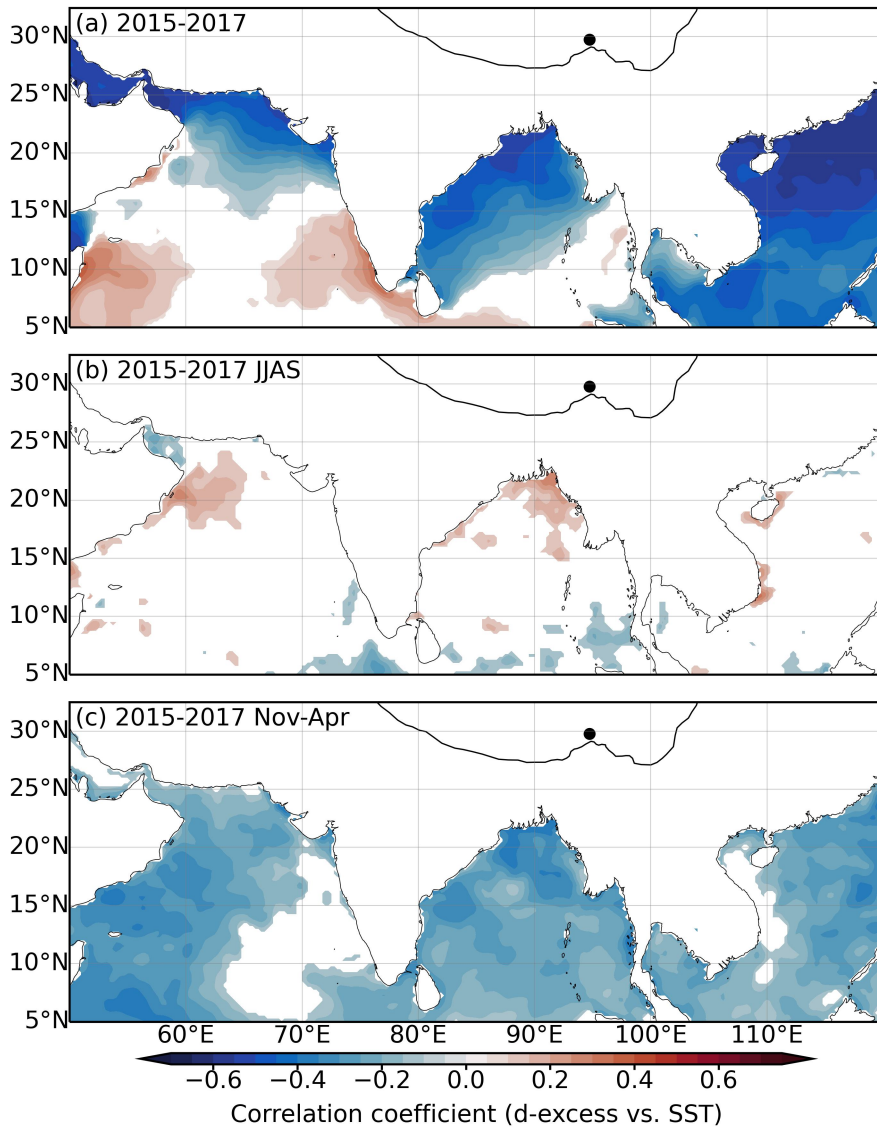

54

55 Figure S5. Relationships between water vapor *d*-excess and sea surface temperature (SST). (a) spatial  
 56 distribution of correlation coefficients between vapor *d*-excess and SST  $RH_{SST}$  for all the data from 2015-  
 57 2017. (b) and (c) are the same as (a) but only for the data within the summer monsoon season (JJAS) or the  
 58 non-monsoon season (Nov-Apr), respectively. Only values significant at the 95% significance level are  
 59 shown. The black dots indicate the location of the SETP station. The black solid lines denote the Tibetan  
 60 Plateau with altitude contour at 3000 m.

61

62

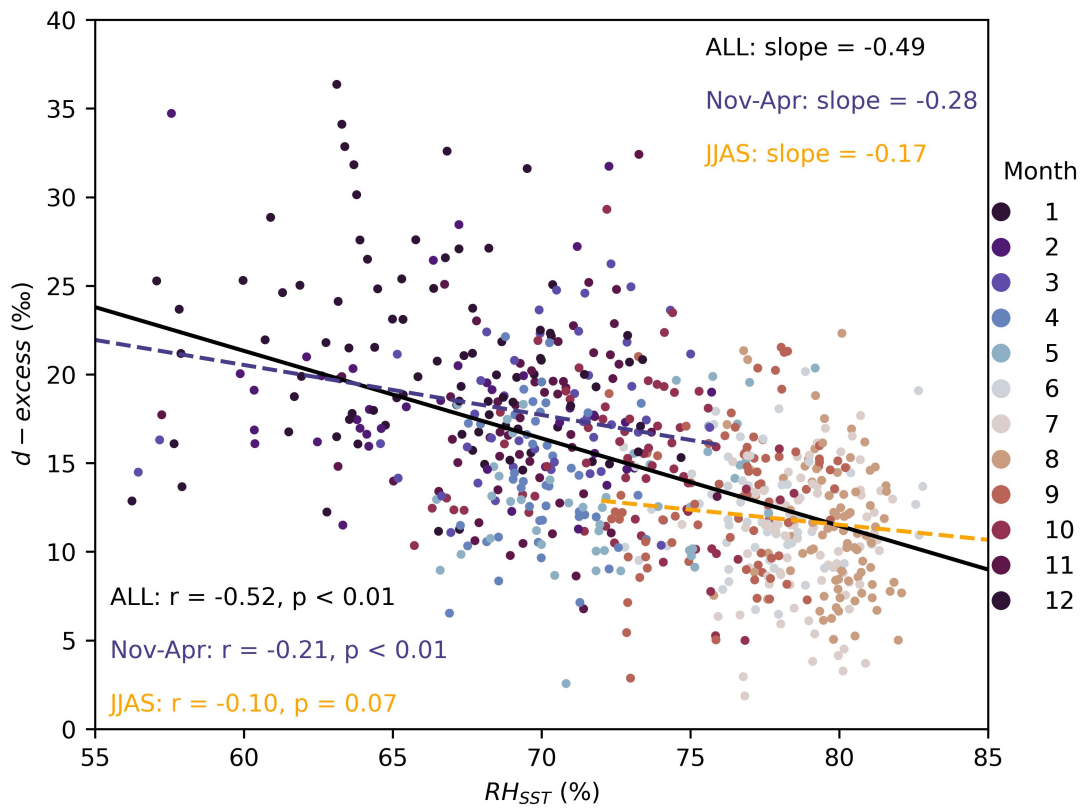

63

64 Figure S6. Relationships between SETP vapor  $d$ -excess and relative humidity normalized to sea surface  
 65 temperature ( $RH_{SST}$ ) averaged over eastern Arabian Sea (7-20°N and 65-78°E) from 2015-2017. The months  
 66 for the data points are color-coded. The solid black line indicates the linear regression between all data points.  
 67 The dashed orange line indicates linear regression for data during the non-monsoon season (Nov-Apr) and  
 68 the dashed dark blue line for data during the summer monsoon (JJAS). The slope (‰ %<sup>-1</sup>),  $r$ , and  $p$  values  
 69 for the three data groups are also shown.

70

71

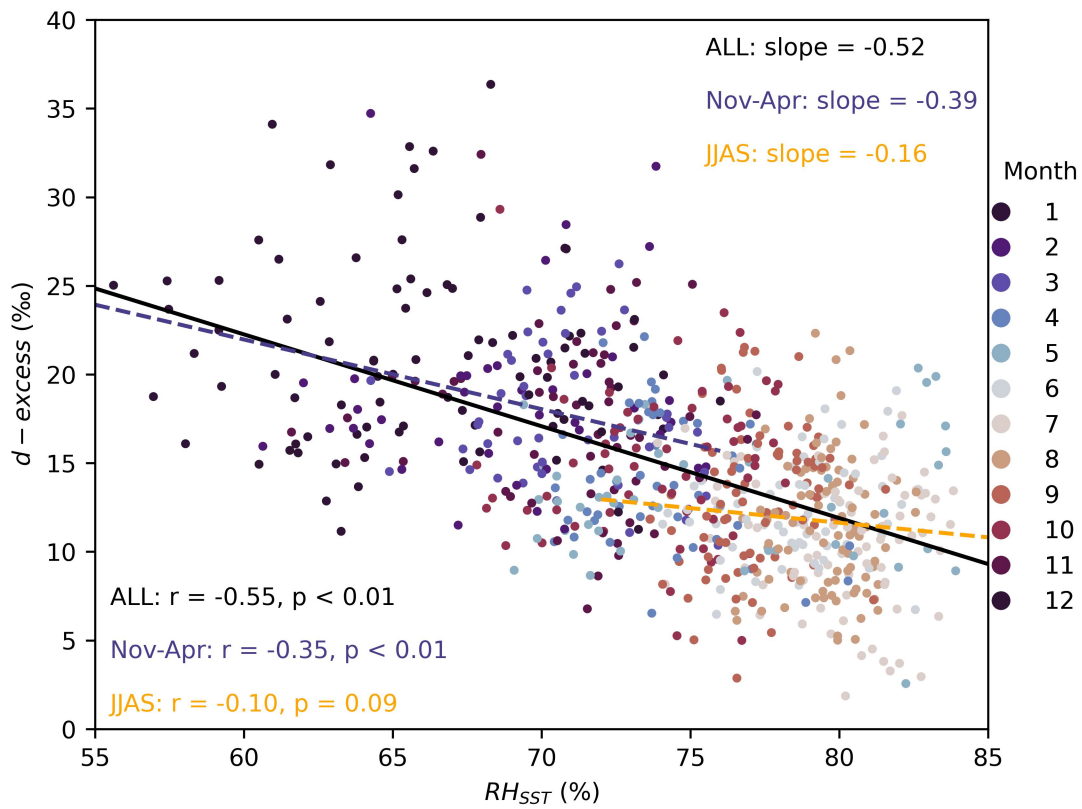

72

73 Figure S7. The same as Fig. S6 but between  $d$ -excess and relative humidity normalized to sea surface  
 74 temperature ( $RH_{SST}$ ) averaged over Bay of Bengal (10-22°N and 80-99°E).

75



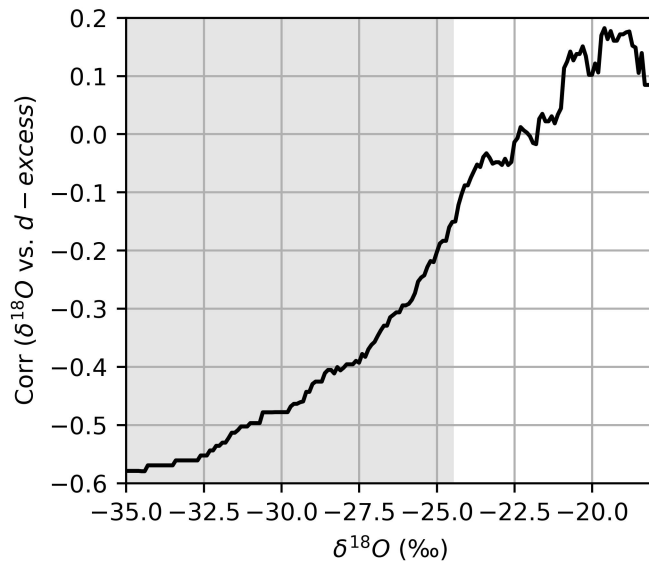

76

77 Figure S8. Correlation coefficients between vapor  $\delta^{18}\text{O}$  and  $d$ -excess for subsets of data that have  $\delta^{18}\text{O}$  values  
 78 higher than certain levels during the summer monsoon season. The gray shading indicates where correlations  
 79 pass the 95% significance test.

80

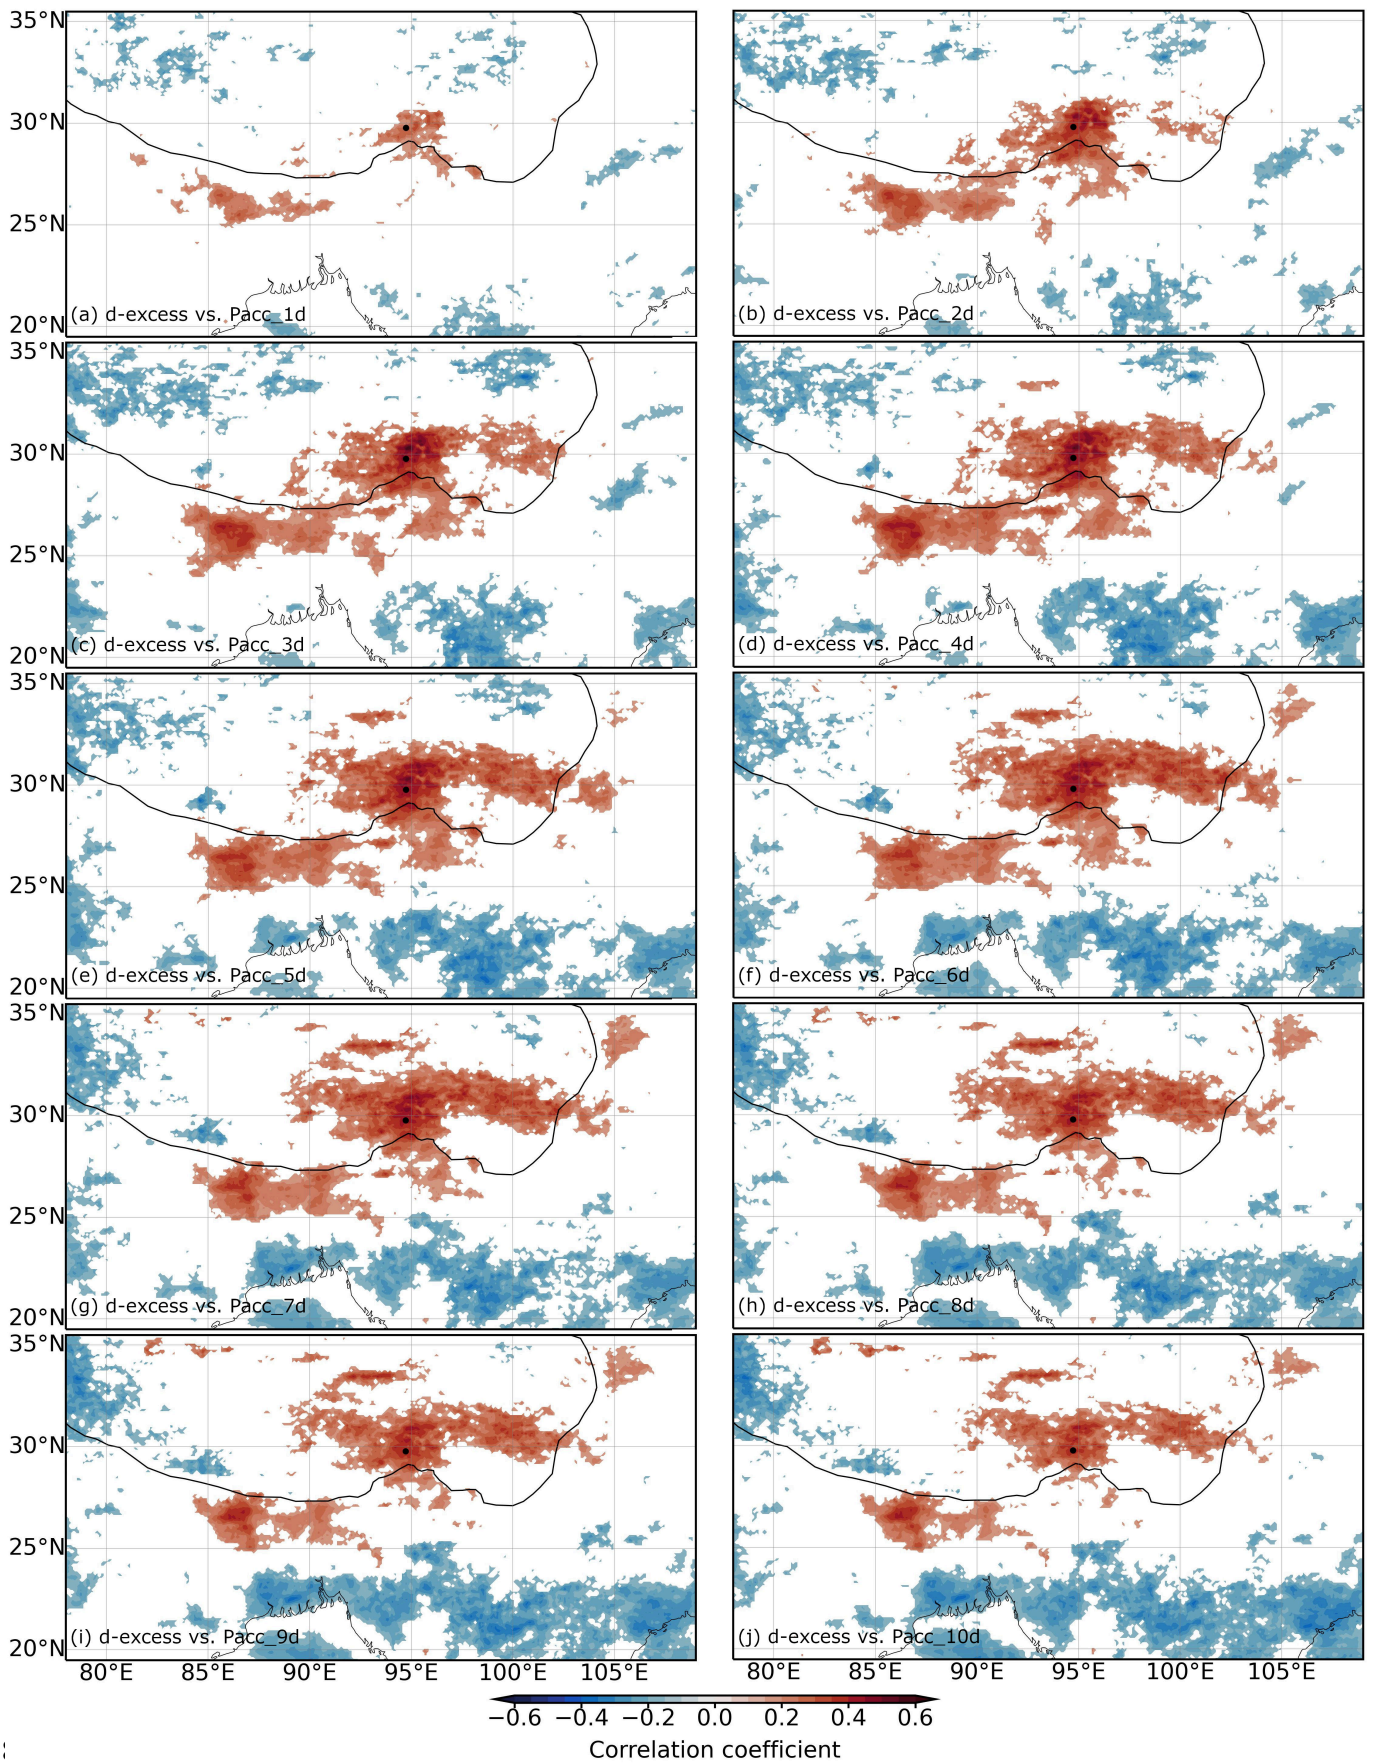

82 Figure S9. (a) spatial distribution of correlation coefficients between vapor  $d$ -excess and total precipitation  
 83 amount during 1-day prior sampling ( $P_{acc\_1d}$ ). (b-j) are the same as (a) but for total precipitation amount  
 84 during 2-10 days prior sampling. Only values significant at the 95% significance level are shown.

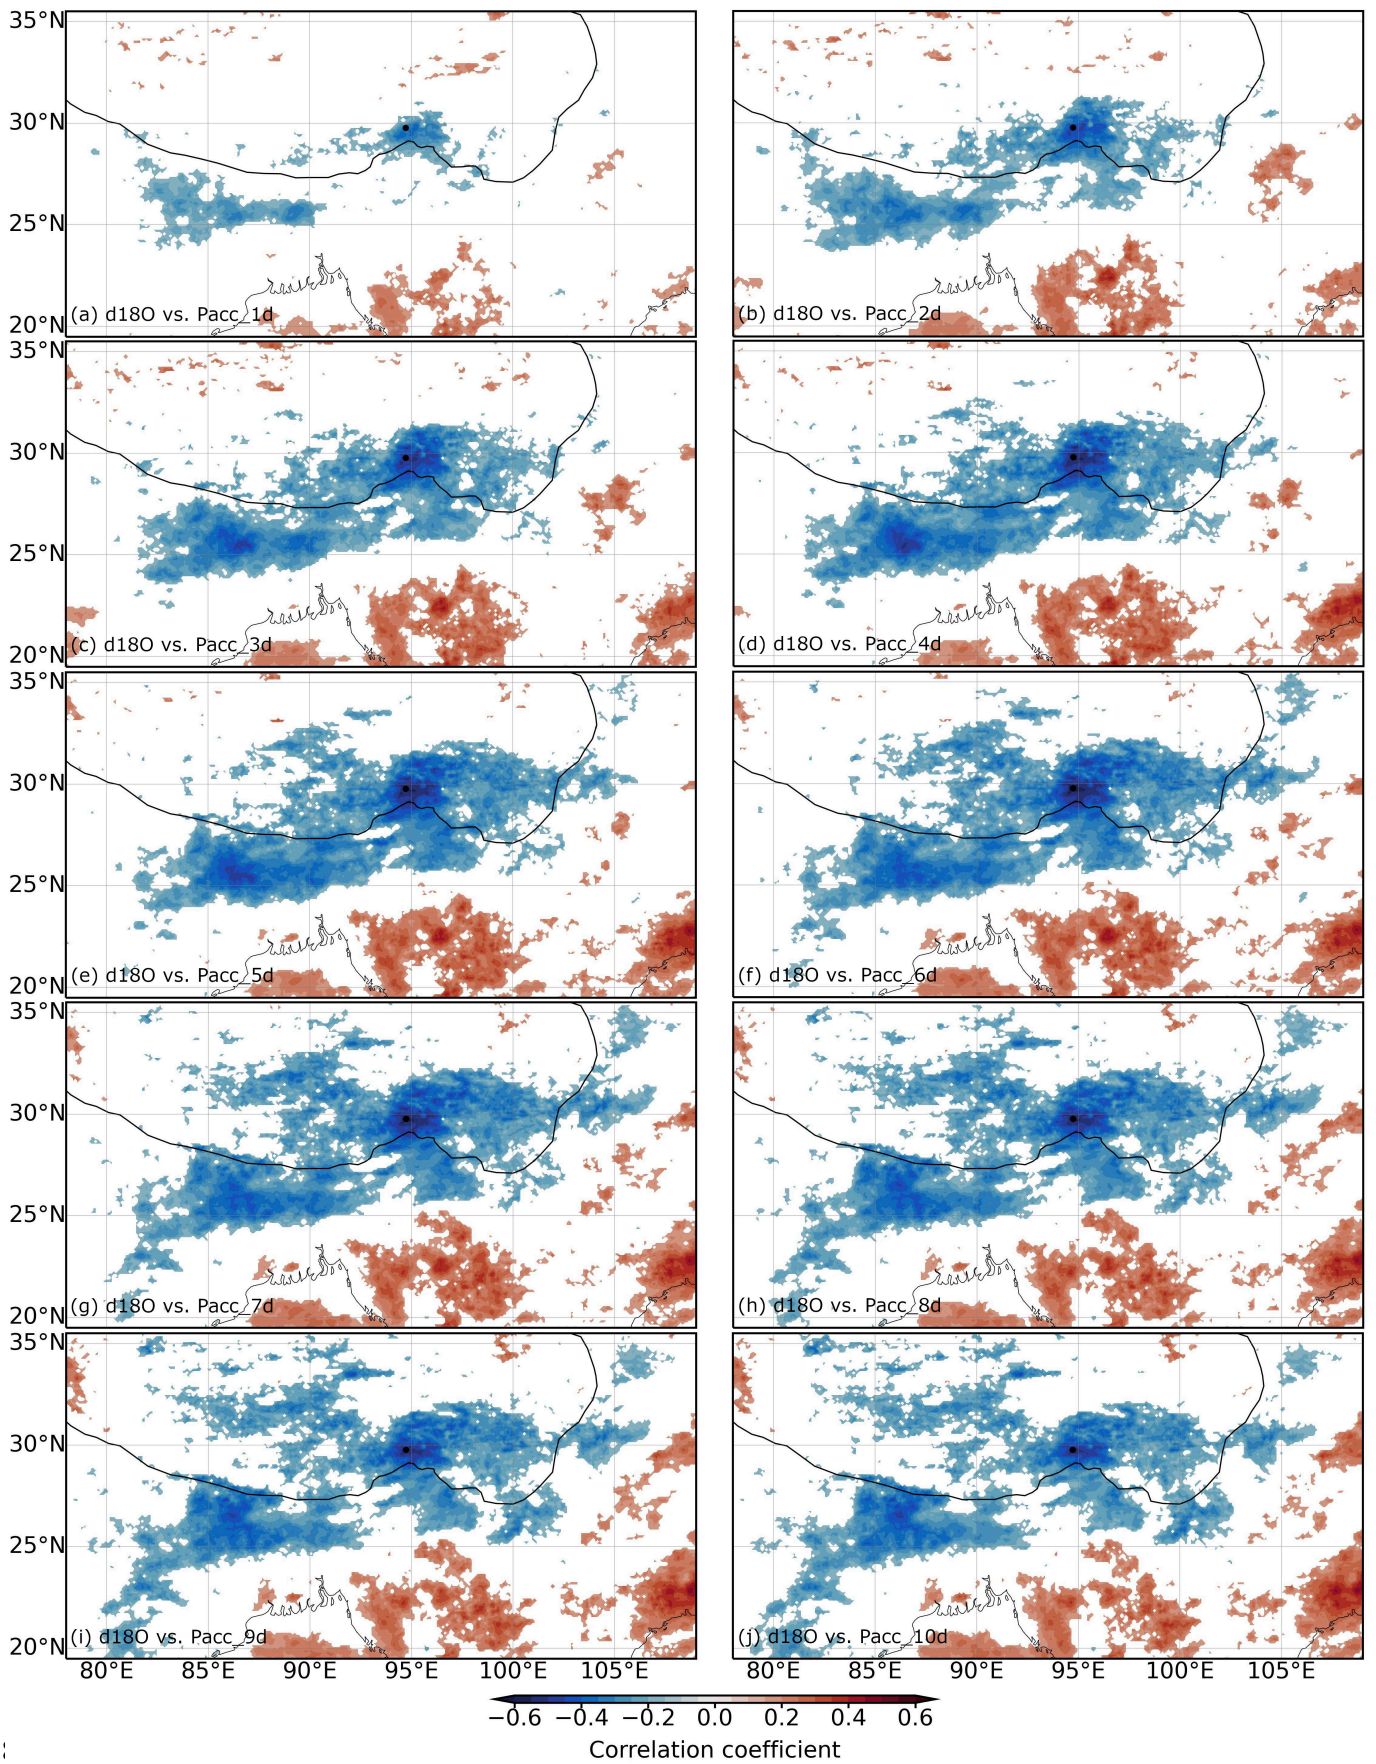

86 Figure S10. Same as Fig. S9 but for vapor  $\delta^{18}\text{O}$ .

87

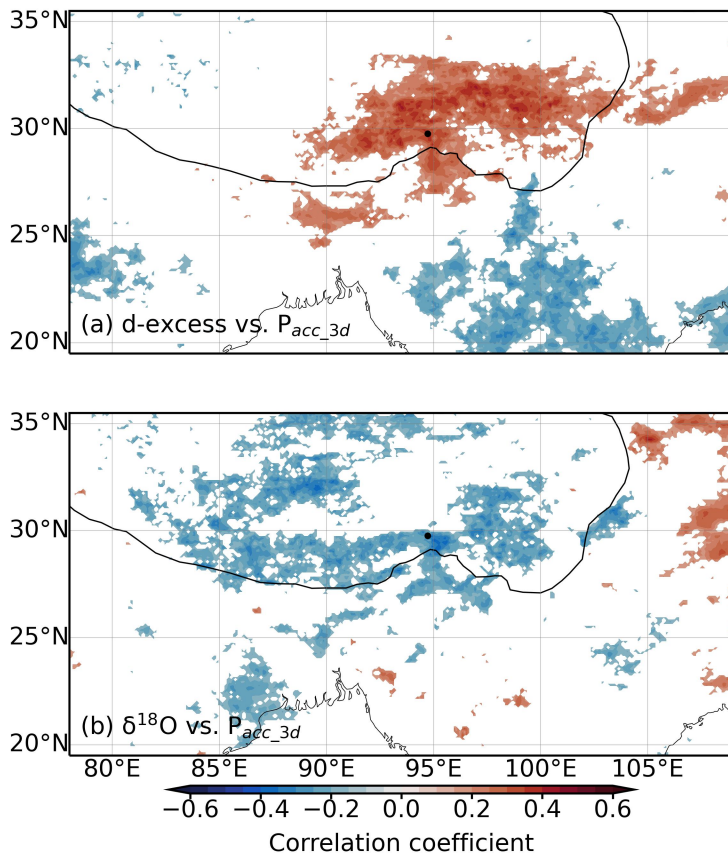

88

89 Figure S11. Relationships between SETP vapor isotope compositions for non-rainy days (local daily  
 90 precipitation amount less than 2 mm) and total precipitation amount at the regional scale during the summer  
 91 monsoon season. (a) spatial distribution of correlation coefficients between vapor  $d$ -excess and total  
 92 precipitation amount during the 3 days prior sampling ( $P_{acc\_3d}$ ). (b) is the same as (a) but for  $\delta^{18}O$ . Only values  
 93 significant at the 95% significance level are shown.

94
